# Supplementary material for: Regulation of T-independent B-cell responses by microRNA-146a
Source: PubMed Central journal article supplement (PMC9511149; doi:10.3389/fimmu.2022.984302), 2022-09-12
Supplement: DataSheet_1.pdf [file DataSheet_1.pdf]

Regulation of T-Independent  
B-Cell Responses by  
MicroRNA-146a  
King et al...

Supplement

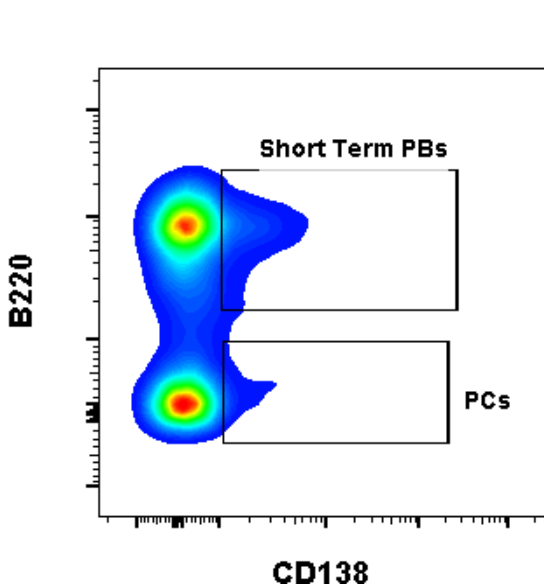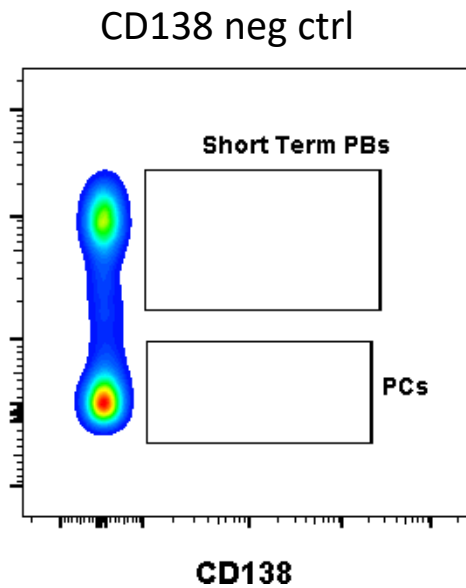

Supplement 1: Representative FACS plot of splenic plasma cell subsets from primary immunization response to T-independent antigen (left) vs. B220+CD138- negative staining control (right).

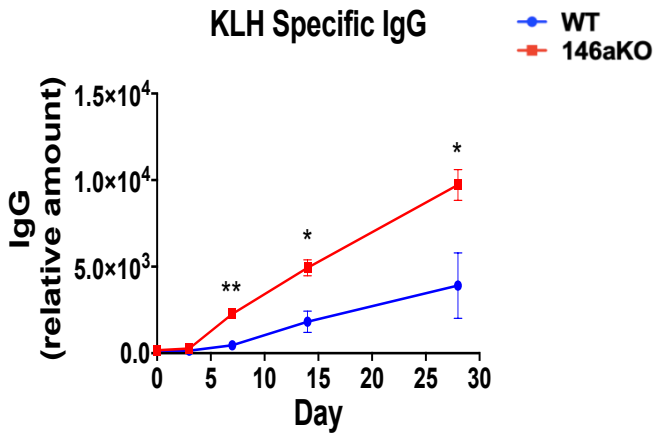

**Supplement 2A: miR-146aKO B-cells have higher peptide specific IgG secretion in response to T-dependent antigen than WT.** After *in vivo* immunization with T-dependent antigen Keyhole Limpet Hemocyanin (TNP-KLH), KLH specific IgG responses were higher in miR-146aKO than in WT (*t* test; \**P* ≤ 0.05, \*\**P* < 0.01). n = 3 mice/group. Data represent mean ± SEM.

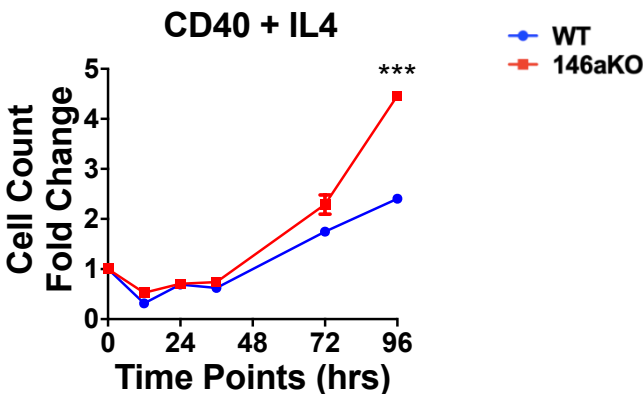

**Supplement 2B: MiR-146aKO splenic B-cells activated with T-dependent stimuli have higher cell counts than WT.** B-cells were stimulated with anti-CD40 (5ug/ml) along with IL-4 (5ng/ml). Representative of 3 mice/group in duplicates or triplicates, confirmed in 2 independent experiments. (*t* test; \*\*\**P* < 0.001).

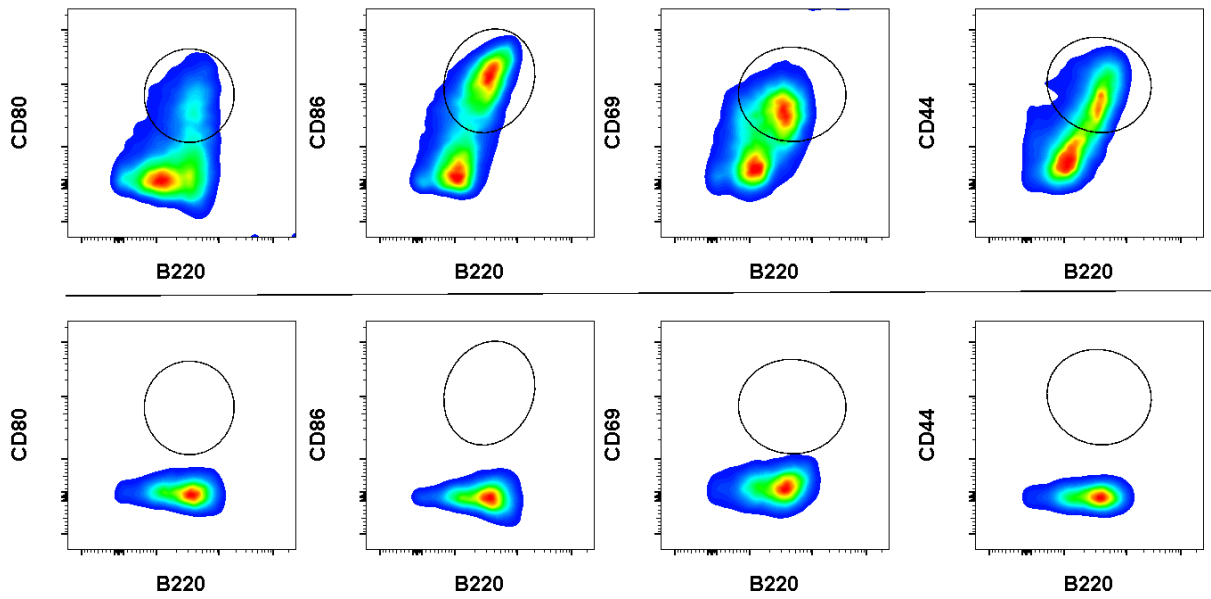

**Supplement 3. Representative FACS plots for splenic B220+ cell surface activation markers (top panel) with FMOs (bottom panel).**

A

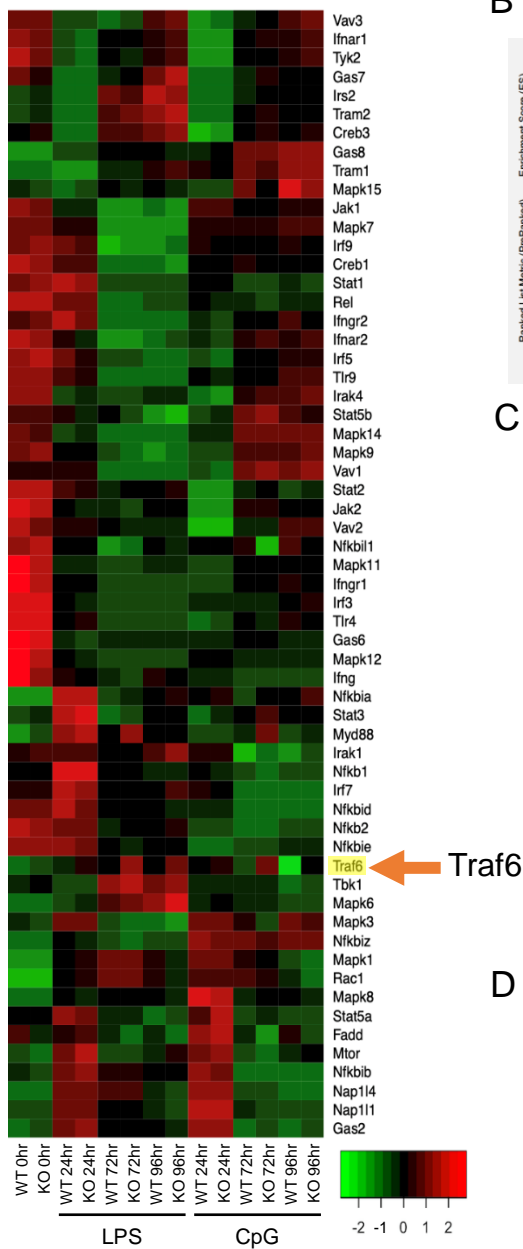

B

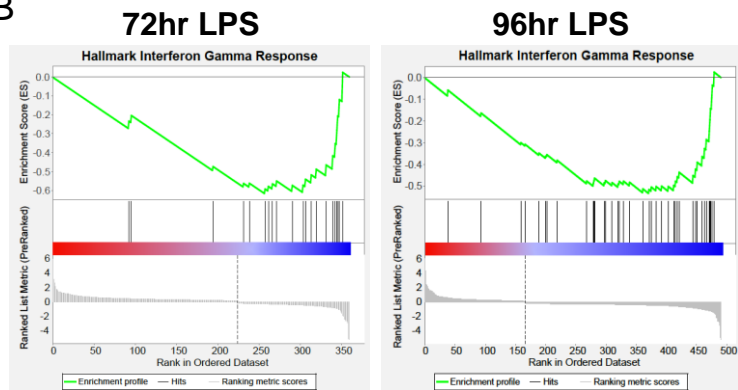

C

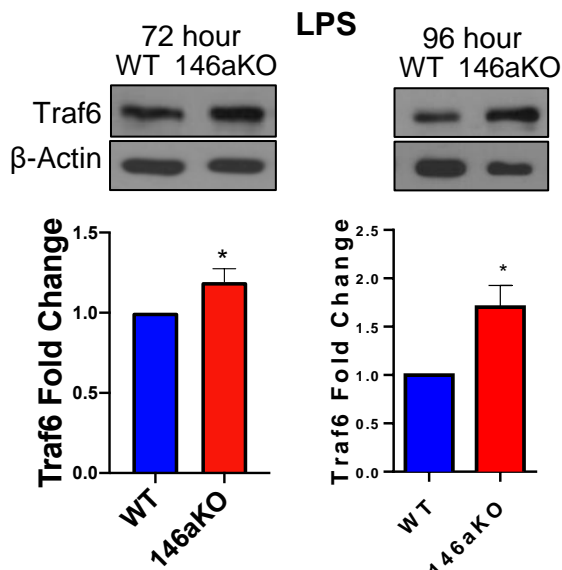

D

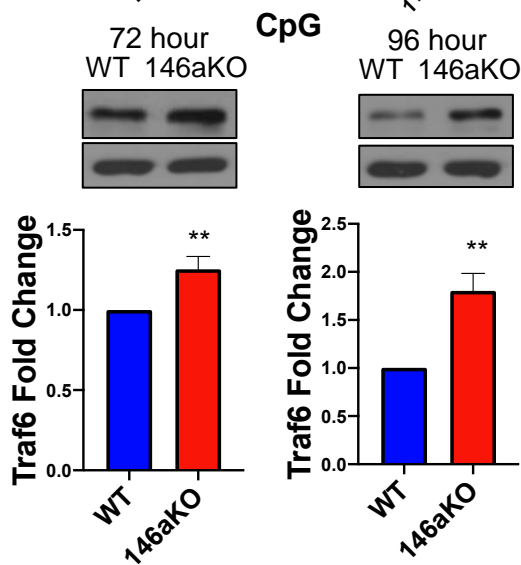

**Supplement 4: *Traf6* expression increases with T-independent antigen stimulation of B-cells.** (A) Heatmap from the RNA-Seq data showing differentially expressed IFN targeted genes. miR-146a molecular target, *Traf6*, is highlighted in yellow. (B) Gene set enrichment analysis (GSEA) of genes differentially expressed between WT and miR-146aKO activated B-cells shows enrichment in Interferon  $\gamma$  pathways. 72hrs Normalized Enrichment Score: -1.96; FDR q value: 0.0. 96hrs Normalized Enrichment Score: -1.85; FDR q value: 0.046. (C) Protein expression via Western Blot of TRAF6 in B-cells when stimulated with LPS and (D) CpG. t test; \* $P < 0.05$ , \*\* $P < 0.01$ . Data represent mean  $\pm$  SEM. Graphs combine 3 independent experiments (n = 3-4 mice/group/exp).

A

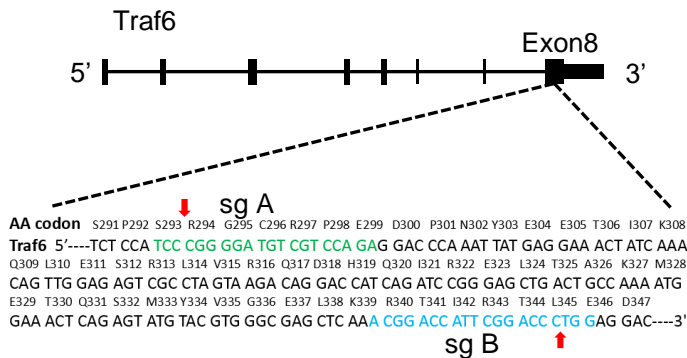

B

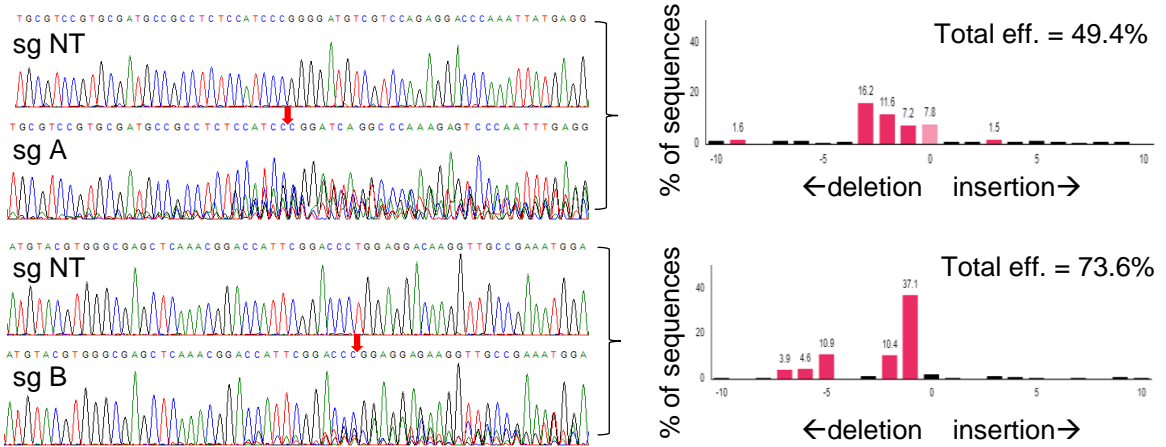

C

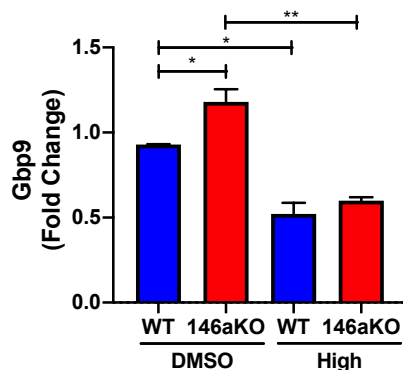

**Supplement 5: Traf6 sgRNAs for CRISPR/Cas9.** (A) sgRNAs (sg A and B) location on Exon 8 of *Traf6*. AA codon sequence indicates the detail location. (B) TIDE analysis of engrafted primary bone marrow cells transduced with sg NT, A, and B (GFP+ mCherry+ cells) respectively. Left panel is the sequence, red arrows show the position of double strand breaks (DSBs) that should be introduced by CRISPR/Cas9; right panel is the TIDE results, total eff. means sum for all the types of gene editing. (C) RT-qPCR of downstream *Traf6* gene, *Gbp9*, in LPS-stimulated B-cells treated with DMSO or high dose of C25-140. t test; \* $P < 0.05$ , \*\* $P < 0.01$ .

**Supplementary Table 1. List of antibody stains used in FACS analysis.**

---

| <b>Antigen</b> | <b>Clone</b> |
|----------------|--------------|
| B220           | RA3-6B2      |
| CD21           | 7E9          |
| CD23           | B3B4         |
| CD80           | 16-10A1      |
| CD86           | GL-1         |
| CD69           | H1.2F3       |
| CD44           | IM7          |
| CD40           | HM40-3       |
| CD138          | 281-2        |
| CD93           | AA4.1        |
| GL7            | GL7          |
| CD95           | SA367H8      |
| IgD            | 11-26c.2a    |
| CD3e           | 145-2C11     |
| CD11b          | M1/70        |
| Ly-6c          | HK1.4        |



## Supplementary Table 2. sgRNA and primer sequences used in this study.

| sgRNA     | Sequence                  |
|-----------|---------------------------|
| sg A (F)  | TTTGTCTGGACGACATCCCCGGGA  |
| sg A (R)  | AAACTCCCGGGGATGTCGTCCAGA  |
| sg B (F)  | TTTGACGGACCATTTCGGACCCTGG |
| sg B (R)  | AAACCCAGGGTCCGAATGGTCCGT  |
| sg NT (F) | TTTGCGAGGTATTCGGCTCCGCG   |
| sg NT (R) | AAACCGCGGAGCCGAATACCTCG   |
| m-Traf6-F | GCACAAGTGCCCAGTTGAC       |
| m-Traf6-R | TGCAAAATTGTCGGGAAACAGT    |
| m-Cd72-F  | CATACCCTCGGAAGTCTGGA      |
| m-Cd72-R  | GCCTCCACTTCTTGCTCATC      |
| m-Ccng1-F | TAAGTGGCCGAGATTTGACC      |
| m-Ccng1-R | ATGGTCTCAGGAATCGTTGG      |
| m-Gbp9-F  | TGTGCAGTCTCAGACCAAGG      |
| m-Gbp9-R  | AAGCACACTTAGGGCGAAGA      |
